# Supplementary material for: Hydroxyapatite/Poly (Butylene Succinate)/Metoprolol Tartrate Composites with Controllable Drug Release and a Porous Structure for Bone Scaffold Application
Source: MDPI journal article supplement (doi:10.3390/polym15214205), 2023-10-24
Supplement: s1 [file s1]

# Hydroxyapatite/poly (butylene succinate)/metoprolol tartrate composites with controllable drug release and porous structure for bone scaffold application

*Hongming Yang<sup>1</sup>, Rui Pan<sup>1</sup>, Yuan Zhou<sup>1</sup>, Guiting Liu<sup>1\*</sup>, Rong Chen<sup>1\*</sup>, Shaoyun Guo<sup>1</sup>*

<sup>1</sup>The State Key Laboratory of Polymer Materials Engineering, Polymer Research Institute of Sichuan University, Chengdu 610065, China

## \* Correspondence:

Rong Chen; Guiting Liu

rongchen@scu.edu.cn;liugt@scu.edu.cn

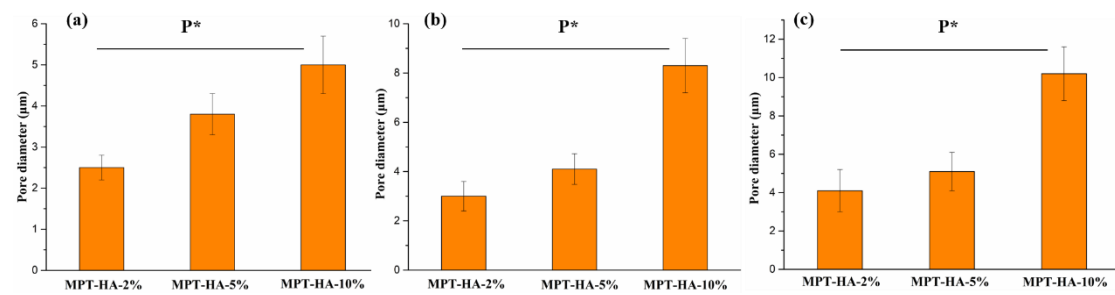

Figure S1. Pore diameter analysis of HA/PBS/MPT composites after immersion of 2 h (a), 12 h (b) and 36 h (c).

Table S1. Pore diameter (μm) of HA/PBS/MPT composites after immersion for different times

| Specimen   | 2 h | 12 h | 36 h |
|------------|-----|------|------|
| MPT-HA-2%  | 2.5 | 3.1  | 4.1  |
| MPT-HA-5%  | 3.8 | 4.2  | 4.9  |
| MPT-HA-10% | 5.1 | 8.3  | 10.2 |

The Ca/P mass ratio is 1.48, which is close to the theoretical Ca/P mass ratio (1.67) of HA.

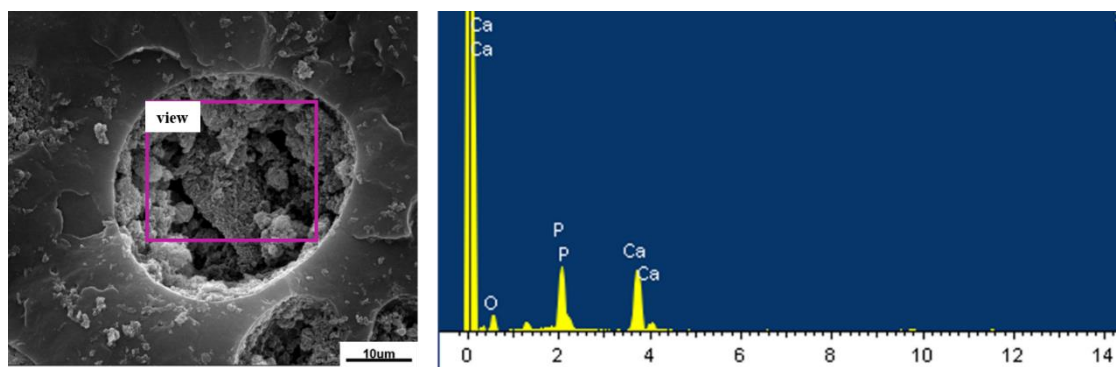

Figure S2. EDS analysis of MPT-HA-10% samples immersion in PBS for 36 hours.

Table S2. The quantitative statistics of element mass proportion

| Element | Weight Percentage, % | Atomic percentage, % |
|---------|----------------------|----------------------|
| O       | 39.16                | 59.14                |
| P       | 23.68                | 16.47                |
| Ca      | 37.16                | 24.40                |
